# Supplementary material for: A qRT-PCR assay for the expression of all Mal d 1 isoallergen genes
Source: PubMed Central journal article supplement (PMC3616815; doi:10.1186/1471-2229-13-51), 2013-03-23
Supplement: 1471-2229-13-51-S2.pdf [file 1471-2229-13-51-S2.pdf]

| Majority                   | 10                       | 20                  | 30               | 40         | 50          | 60 | 70 | 80 | 90 | 100 | 110 | 120 | 130 | 140 | 150 | 160 |
|----------------------------|--------------------------|---------------------|------------------|------------|-------------|----|----|----|----|-----|-----|-----|-----|-----|-----|-----|
| Md 1.03A-MDP00029542.seq   | AT TGGG TTTT TCACATACGAA | CCGAGTTCACCTCGGTCAT | CCCCCTCTAGTGTGTT | CAATGCCTTT | TTTCTTGATGC |    |    |    |    |     |     |     |     |     |     |     |
| Md 1.03B-MDP00029931.seq   | AT TGGG TTTT TCACATACGAA | CCGAGTTCACCTCGGTCAT | CCCCCTCTAGTGTGTT | CAATGCCTTT | TTTCTTGATGC |    |    |    |    |     |     |     |     |     |     |     |
| Md 1.03E-MDP00029543.seq   | AT TGGG TTTT TCACATACGAA | CCGAGTTCACCTCGGTCAT | CCCCCTCTAGTGTGTT | CAATGCCTTT | TTTCTTGATGC |    |    |    |    |     |     |     |     |     |     |     |
| Md 1.03J-MDP000081519.seq  | AT TGGG TTTT TCACATACGAA | CCGAGTTCACCTCGGTCAT | CCCCCTCTAGTGTGTT | CAATGCCTTT | TTTCTTGATGC |    |    |    |    |     |     |     |     |     |     |     |
| Md 1.03F-MDP0000533838.seq | AT TGGG TTTT TCACATACGAA | CCGAGTTCACCTCGGTCAT | CCCCCTCTAGTGTGTT | CAATGCCTTT | TTTCTTGATGC |    |    |    |    |     |     |     |     |     |     |     |
| Md 1.08-MDP0000174018.seq  | AT TGGG TTTT TCACATACGAA | CCGAGTTCACCTCGGTCAT | CCCCCTCTAGTGTGTT | CAATGCCTTT | TTTCTTGATGC |    |    |    |    |     |     |     |     |     |     |     |
| Md 1.09-MDP0000260110.seq  | AT TGGG TTTT TCACATACGAA | CCGAGTTCACCTCGGTCAT | CCCCCTCTAGTGTGTT | CAATGCCTTT | TTTCTTGATGC |    |    |    |    |     |     |     |     |     |     |     |
| Md 1.03C-MDP0000611199.seq | AT TGGG TTTT TCACATACGAA | CCGAGTTCACCTCGGTCAT | CCCCCTCTAGTGTGTT | CAATGCCTTT | TTTCTTGATGC |    |    |    |    |     |     |     |     |     |     |     |
| Md 1.03H-MDP0000418277.seq | AT TGGG TTTT TCACATACGAA | CCGAGTTCACCTCGGTCAT | CCCCCTCTAGTGTGTT | CAATGCCTTT | TTTCTTGATGC |    |    |    |    |     |     |     |     |     |     |     |
| Md 1.03D-MDP000081519.seq  | AT TGGG TTTT TCACATACGAA | CCGAGTTCACCTCGGTCAT | CCCCCTCTAGTGTGTT | CAATGCCTTT | TTTCTTGATGC |    |    |    |    |     |     |     |     |     |     |     |
| Md 1.06D-MDP0000288293.seq | AT TGGG TTTT TCACATACGAA | CCGAGTTCACCTCGGTCAT | CCCCCTCTAGTGTGTT | CAATGCCTTT | TTTCTTGATGC |    |    |    |    |     |     |     |     |     |     |     |
| Md 1.06A-MDP0000399350.seq | AT TGGG TTTT TCACATACGAA | CCGAGTTCACCTCGGTCAT | CCCCCTCTAGTGTGTT | CAATGCCTTT | TTTCTTGATGC |    |    |    |    |     |     |     |     |     |     |     |
| Md 1.14-MDP0000195610.seq  | AT TGGG TTTT TCACATACGAA | CCGAGTTCACCTCGGTCAT | CCCCCTCTAGTGTGTT | CAATGCCTTT | TTTCTTGATGC |    |    |    |    |     |     |     |     |     |     |     |
| Md 1.01-MDP0000103621.seq  | AT TGGG TTTT TCACATACGAA | CCGAGTTCACCTCGGTCAT | CCCCCTCTAGTGTGTT | CAATGCCTTT | TTTCTTGATGC |    |    |    |    |     |     |     |     |     |     |     |
| Md 1.06B-MDP0000216907.seq | AT TGGG TTTT TCACATACGAA | CCGAGTTCACCTCGGTCAT | CCCCCTCTAGTGTGTT | CAATGCCTTT | TTTCTTGATGC |    |    |    |    |     |     |     |     |     |     |     |
| Md 1.13A-MDP0000611200.seq | AT TGGG TTTT TCACATACGAA | CCGAGTTCACCTCGGTCAT | CCCCCTCTAGTGTGTT | CAATGCCTTT | TTTCTTGATGC |    |    |    |    |     |     |     |     |     |     |     |
| Md 1.13C-MDP0000750556.seq | AT TGGG TTTT TCACATACGAA | CCGAGTTCACCTCGGTCAT | CCCCCTCTAGTGTGTT | CAATGCCTTT | TTTCTTGATGC |    |    |    |    |     |     |     |     |     |     |     |
| Md 1.05-MDP0000149794.seq  | AT TGGG TTTT TCACATACGAA | CCGAGTTCACCTCGGTCAT | CCCCCTCTAGTGTGTT | CAATGCCTTT | TTTCTTGATGC |    |    |    |    |     |     |     |     |     |     |     |
| Md 1.02-MDP00000942516.seq | AT TGGG TTTT TCACATACGAA | CCGAGTTCACCTCGGTCAT | CCCCCTCTAGTGTGTT | CAATGCCTTT | TTTCTTGATGC |    |    |    |    |     |     |     |     |     |     |     |
| Md 1.12-MDP0000199487.seq  | AT TGGG TTTT TCACATACGAA | CCGAGTTCACCTCGGTCAT | CCCCCTCTAGTGTGTT | CAATGCCTTT | TTTCTTGATGC |    |    |    |    |     |     |     |     |     |     |     |
| Md 1.11B-MDP0000203197.seq | AT TGGG TTTT TCACATACGAA | CCGAGTTCACCTCGGTCAT | CCCCCTCTAGTGTGTT | CAATGCCTTT | TTTCTTGATGC |    |    |    |    |     |     |     |     |     |     |     |
| Md 1.11A-MDP0000789174.seq | AT TGGG TTTT TCACATACGAA | CCGAGTTCACCTCGGTCAT | CCCCCTCTAGTGTGTT | CAATGCCTTT | TTTCTTGATGC |    |    |    |    |     |     |     |     |     |     |     |

Decoration Decoration #: Shade (with solid black) residues that match the Consensus exactly.
